# Supplementary material for: The Urban CoCreation Lab—An Integrated Platform for Remote and Simultaneous Collaborative Urban Planning and Design through Web-Based Desktop 3D Modeling, Head-Mounted Virtual Reality and Mobile Augmented Reality: Prototyping a Minimum Viable Product and Developing Specifications for a Minimum Marketable Product
Source: MDPI journal article supplement (doi:10.3390/app12020797), 2022-01-13
Supplement: s1 [file s1]

Archive with 5 entries (5 files):
- AGENDA for workshop series 1.pdf
- Observation and discussion points workshop 2-1.pdf
- Questionnaire workshop 2-1.pdf
- Questionnaires and discussion points workshop series 1.pdf
- Questions and discussion points for workshop 2-3.pdf
