# Supplementary material for: The Urban CoCreation Lab—An Integrated Platform for Remote and Simultaneous Collaborative Urban Planning and Design through Web-Based Desktop 3D Modeling, Head-Mounted Virtual Reality and Mobile Augmented Reality: Prototyping a Minimum Viable Product and Developing Specifications for a Minimum Marketable Product
Source: MDPI journal article supplement (doi:10.3390/app12020797), 2022-01-13
Supplement: s1 [file s1]

## **Workshop series 1 Agenda**

Set up the workshop: Questionnaires, stationaries, disinfectants, laptop projection

13:00 Gather around the entrance of the working lab

13:10 In the conference room, start presentation

13:15 Start demo 5 minutes each for VR and MAR

13:25 End presentation, divide into two groups

### **VR/Scaled AR**

#### **13:30**

VR: Individually trying

Headset on

Look around the environment

Try the controller to move around the environment

Try pointing, moving, deleting, pinning (modifying not available)

#### **13:30**

Find the AR marker

Find the 3D model

Go around and examine the model

Try pointing, moving, deleting, pinning, and modifying (available on AR)

#### **13:40**

VR users point at a building and instruct AR users to change something.

MAR users change according to the instruction of VR users.

MAR users point at a box to be removed, and VR users removes it.

#### **13:50**

After the hands-on trial,

Task 1: examine the projection of the architectural models and on VR and MAR.

Discuss the building among the participants

#### **14:00**

Task 2: Go to site B

Collaboratively design student building volumes.

#### **14:10** Change the platforms

Get to know the basic functions as above.

#### **14:20**

Task 1: examine the projection of the architectural models and on VR and MAR.

Discuss the architectural model among the participants

#### **14:30**

Task 2: Go to site B

Collaboratively design student building volumes.

(End 14:40)

**14:40** Move downstairs, grab coffee and tea and start walking to the site A

**15:00** At the Site A

On-site MAR as one group

**15:00**

Task 1: examine the projection of the architectural models

Discuss the building among the participants

**15:15**

Task 2: Go to site B

Project what has been designed using VR and scale MAR

Collaboratively design a student building with additional functions

**15:30** Start walking back to Walking lab

**15:40** Grab coffee tea and fruits and walk up to the conference room

**15:50** Projection and presentation of the created models

Discussion

**16:30** Start filling the questionnaires
