# Supplementary material for: The Urban CoCreation Lab—An Integrated Platform for Remote and Simultaneous Collaborative Urban Planning and Design through Web-Based Desktop 3D Modeling, Head-Mounted Virtual Reality and Mobile Augmented Reality: Prototyping a Minimum Viable Product and Developing Specifications for a Minimum Marketable Product
Source: MDPI journal article supplement (doi:10.3390/app12020797), 2022-01-13
Supplement: s1 [file s1]

## Questions and discussion points for workshop 2-3

### 1) Issues and wishes for visualization

| Sub-themes               | Issues and wishes                                                                                                                                                                           | Detailing for workshop 2-3                                                                                                                                                                                                                                                                                  |
|--------------------------|---------------------------------------------------------------------------------------------------------------------------------------------------------------------------------------------|-------------------------------------------------------------------------------------------------------------------------------------------------------------------------------------------------------------------------------------------------------------------------------------------------------------|
| Scale                    | Sense of scale is still an issue.                                                                                                                                                           | 1. Is floor lines not enough in which way?<br>2. would adding a human scale model or other objects help?                                                                                                                                                                                                    |
| Information              | Building functions need to be indicated.<br>More maps with different data.<br>Create one's own map layer, ex) heatmaps with important information, roads, entrances, meeting places         | 1. Does the function changing the color of the building work for this?<br>2. How would you indicated building functions?<br>3. Entrances need to be indicated. Entrances and windows?<br>4. What is meant with meeting places?                                                                              |
| Detailing                | Better graphics are needed for walk-through.<br>Different textures for the buildings including transparency. Same color building volumes make a wall-like effect viewed from long distance. | 1. The graphic quality depends on the 3D materials we can acquire for the project. What would be the minimum quality?<br>2. Which textures would be good to include? Concrete, bricks, glass, any other? Should the users could upload textures to be used?<br>3. Is transparency and reflection important? |
| Orientating and locating | Drop anchor points to go back to or send people to a specific location.<br>Eye-level remains on the original terrain level when walking on lowered ground level using terräng tool          |                                                                                                                                                                                                                                                                                                             |

### 2) Issues and wishes for Modelling

| Sub-themes      | Issues and wishes                                                                                                                                                                                         |                                                                                                          |
|-----------------|-----------------------------------------------------------------------------------------------------------------------------------------------------------------------------------------------------------|----------------------------------------------------------------------------------------------------------|
| Methods         | Roads are drawn on top of vegetation<br>Drawing polygon and extruding<br>Scaling the heights by inputting the values should scale down from the top of the buildings.<br>More forms and shapes are needed | 1. If polygon can be drawn and extruded for modelling, what would be good to have?<br>Dimension, angles? |
| Functionalities | Copy and paste<br>Go back                                                                                                                                                                                 | 1. Any other basic functions?                                                                            |
| User interface  | Text should be zoomed in and out.                                                                                                                                                                         |                                                                                                          |

### 3) Issues and wishes Remote simultaneous collaboration

| Sub-themes           | Issues and wishes                                     |                                                              |
|----------------------|-------------------------------------------------------|--------------------------------------------------------------|
| Remote communication | Click to gather other participants to one's own view. | 1. how much detail is needed for avatars look? Just colors?? |

|                                    |                                                                                                                                                                                                                                                                                                     |                                         |
|------------------------------------|-----------------------------------------------------------------------------------------------------------------------------------------------------------------------------------------------------------------------------------------------------------------------------------------------------|-----------------------------------------|
|                                    | <p>Avatars should look different.<br/>Turning off a specific folder view with building volumes should be shared with other users so that one can hide some of the building volumes for everyone.</p> <p>Laser points to show where one person is pointing at</p> <p>Sessions should be recorded</p> | 2. Synchronizing the view for everyone? |
| Compatibility with other platforms | <p>Importing PNG is problematic<br/>Importing sketch-up model is also problematic<br/>Roads need to be imported more easily</p>                                                                                                                                                                     | 1. Which formats should be imported ?   |
| Isolation and synchronising        | <p>Locking and unlocking volumes for all to prevent accidental removal of buildings.</p> <p>A visitor account to limit number of people who can participate actively for higher quality of discussion</p>                                                                                           |                                         |

#### 4) Issues and wishes for Simulation

| Sub-themes          | Issues and wishes                                                                |                                                         |
|---------------------|----------------------------------------------------------------------------------|---------------------------------------------------------|
| Design consequences | Simulative information related to sustainability, energy use, density            | 1. Can we create a specific list or useful simulations? |
| Preset scenarios    | Calculating number of offices, apartment per building with pre-programmed values | 1. Can we create a specific list?                       |

#### Discussion points:

##### 1. Repetition from first series of workshops:

- a. Scale: What can be changed? Suggestions? A human model? A Car??
- b. Level of graphical detail: How much more detailed for the platform to work?
- c. Taking others to an anchored point: Is saving a specific place as anchor enough?  
Synchronizing the view?

##### 2. Details need to be specified:

- a. Can we make a list of simulations that would be important to implement?

Energy Use  
Density

- b. Can we create a list of type of area calculation?

Offices  
Apartments  
Rooms  
Built area  
All the combined floor areas  
Communication areas in proportion?

c. Need of different building textures. Can we create a list?

Bricks

Glass

Concrete

Wood

d. Entrances and meeting places should be indicated. Can we make a list of other essential elements?

e. Functionalities such as copy + paste, going back one step has been mentioned. Could we create a list of other essential functions?

f. List of file formats that should be imported?

3D model: Sketchup

Maps + Background images: PNG

g. Level of access: List of accessibility

Full access

Just viewing

3. Need to be able to differentiate

a. Avatars how much detail?

b. Building functions: How? By colors? Or textures?

4. Synchronizing the view for:

a. Folders turning on and off

5. Additional points
