# Supplementary material for: The Urban CoCreation Lab—An Integrated Platform for Remote and Simultaneous Collaborative Urban Planning and Design through Web-Based Desktop 3D Modeling, Head-Mounted Virtual Reality and Mobile Augmented Reality: Prototyping a Minimum Viable Product and Developing Specifications for a Minimum Marketable Product
Source: MDPI journal article supplement (doi:10.3390/app12020797), 2022-01-13
Supplement: s1 [file s1]

## Themes to be raised during the discussion

**What did you do with the tools today? How did you do it?**

When using VR: \_\_\_\_\_

When using Scale AR: \_\_\_\_\_

When using On-site AR: \_\_\_\_\_

**Was there anything you tried to do, but did not succeed? What was difficult? In what way?**

When using VR: \_\_\_\_\_

When using Scale AR: \_\_\_\_\_

When using On-site AR: \_\_\_\_\_

**How did the visualization of the buildings and environments feel? What worked? What didn't?**

When using VR: \_\_\_\_\_

When using Scale AR: \_\_\_\_\_

When using On-site AR: \_\_\_\_\_

**How do you think the tools can be used? For what? With what other stakeholders?**

When using VR: \_\_\_\_\_

When using Scale AR: \_\_\_\_\_

When using On-site AR: \_\_\_\_\_

**Do you think the VOICE over IP is a good function to have?**

\_\_\_\_\_

**Do you think the teleportation is a good function to have?**

\_\_\_\_\_

**Do you think the arrow pointer is a good function to have?**

\_\_\_\_\_

# Questionnaire: Urban CoCreation workshop Series 1

Your name: \_\_\_\_\_

Write in Swedish if you prefer. Continue on the back of the paper if you need more space!  
If you feel you don't have anything to write regarding a question or a tool: skip to the next.

## ***Regarding visualization and designing***

**Do you use visualization as method for communication in your profession?**

YES \_\_\_\_\_ NO \_\_\_\_\_

If so, what type of visualization methods do you use?

---

---

**Compared to the visualization you are used to:**

**Were the tools to create and modify the 3D environment difficult to understand and use?**

*Please estimate:* 3 is the visualization method you are used to, from 1: most difficult to 5: most easy

Difficulty to understand the visualized environment:

VR: 1---2---3---4---5

Scale AR: 1---2---3---4---5

On-site AR: 1---2---3---4---5

Difficulty to navigate in the virtual environment:

VR: 1---2---3---4---5

Scale AR: 1---2---3---4---5

On-site AR: 1---2---3---4---5

Difficulty to place a 3D object in relation to your position (your standing point):

VR: 1---2---3---4---5

Scale AR: 1---2---3---4---5

On-site AR: 1---2---3---4---5

Difficulty to model a 3D object:

VR: 1---2---3---4---5

Scale AR: 1---2---3---4---5

On-site AR: 1---2---3---4---5

Difficulty to communicate your ideas of the 3D environment using:

VR: 1---2---3---4---5

Scale AR: 1---2---3---4---5

On-site AR: 1---2---3---4---5

## Visualization

**How could the visualization and modelling be improved? What could make for example buildings feel more real? And you feel being more part of this virtual environment?**

When using VR: \_\_\_\_\_  
\_\_\_\_\_  
\_\_\_\_\_

When using Scale AR: \_\_\_\_\_  
\_\_\_\_\_  
\_\_\_\_\_

When using On-site AR: \_\_\_\_\_  
\_\_\_\_\_  
\_\_\_\_\_

**What other functions could support immersive visualization and modelling?**

---

---

---

---

---

## Your individual designing

**What did you miss in the tools? What would be useful functions to add for the how to design objects?**

When using VR: \_\_\_\_\_  
\_\_\_\_\_  
\_\_\_\_\_

When using Scale AR: \_\_\_\_\_  
\_\_\_\_\_  
\_\_\_\_\_

When using On-site AR: \_\_\_\_\_  
\_\_\_\_\_  
\_\_\_\_\_

**What other functions could support your individual designing?**

---

---

---

---

---

---

## Collaborative designing

**When designing together with the other participant through the tools: What worked well?**

When using VR: \_\_\_\_\_  
\_\_\_\_\_  
\_\_\_\_\_

When using Scale AR: \_\_\_\_\_  
\_\_\_\_\_  
\_\_\_\_\_

When using On-site AR: \_\_\_\_\_  
\_\_\_\_\_  
\_\_\_\_\_

**What made collaborative designing hard?**

When using VR: \_\_\_\_\_  
\_\_\_\_\_  
\_\_\_\_\_

When using Scale AR: \_\_\_\_\_  
\_\_\_\_\_  
\_\_\_\_\_

When using On-site AR: \_\_\_\_\_  
\_\_\_\_\_  
\_\_\_\_\_

**Could you experience simultaneous input by the others across the three tools (VR/AR)?**

YES\_\_\_\_\_ NO\_\_\_\_\_

\_\_\_\_\_

**Was updating speed good enough to experience the changes made by others in a good way?**

YES\_\_\_\_\_ NO\_\_\_\_\_

\_\_\_\_\_

**Were there difficulties due to the continuous updating made by others?**

YES\_\_\_\_\_ NO\_\_\_\_\_

\_\_\_\_\_

**Would it be useful to add a function to isolate yourself from the input by others while you are designing or adding stuff?**

YES\_\_\_\_\_ NO\_\_\_\_\_

\_\_\_\_\_

### What other functions could support collaborative designing in this way?

[illegible]

### ***A bit more on the usefulness of tool functions***

**Is it useful to mark "intresseområde" with a needle with information, photos etc?**

YES\_\_\_\_\_ NO\_\_\_\_\_

---

**Do you think the drone mapping is useful for your projects and activities?**

YES\_\_\_\_\_ NO\_\_\_\_\_

**Do you think 360-degree video or livestreaming of the area is useful?**

YES\_\_\_\_\_ NO\_\_\_\_\_

**When you cooperate on for example google docs, do you normally use open chat or Voice IP?**

YES\_\_\_\_\_ NO\_\_\_\_\_

**What type of other communication channels could be used for the collaborative designing?**

---

---

---

**Anything else you would like to add?**

[illegible]
