# Supplementary material for: The Urban CoCreation Lab—An Integrated Platform for Remote and Simultaneous Collaborative Urban Planning and Design through Web-Based Desktop 3D Modeling, Head-Mounted Virtual Reality and Mobile Augmented Reality: Prototyping a Minimum Viable Product and Developing Specifications for a Minimum Marketable Product
Source: MDPI journal article supplement (doi:10.3390/app12020797), 2022-01-13
Supplement: s1 [file s1]

You have participated at the workshop tested the platform Urban CoCreation Lab the desktop version for Medicinaregatan housing project corresponding the development process stage 3, Vision. Please fill in the questionnaire and send back to kyung@chalmers.se

**1. General Improvements**

- a. General Interface: Is there any interface problems you encountered? Any improvements that can be made?
- b. Orientation in the space: How was orientating, finding your position, following others point of view? Were there any problems? Any improvements needed?
- c. Visualization: Was level of detail for the environment and the building models sufficient for the discussion at the work-process stage VISION? Were there any problems for perceiving the scale of the buildings?
- d. Modelling: Was there issues with modelling the building volumes? Any problems and points to improve?
- e. Collaboration: How efficient was collaborating simultaneously in designing? Any problems and points to improve?

**2. Functions**

- a. Which function was most useful and least useful for VISION stage?  
Most:  
Least:
- b. Are there any improvements that can be made? Indicate 2 functions that were most useful and how they can be improved.  
1. \_\_\_\_\_  
\_\_\_\_\_  
2. \_\_\_\_\_  
\_\_\_\_\_
- c. Is there any function that needs to be implemented for the use of the platform for the purpose of internal stakeholder discussion at the stage VISION?  
\_\_\_\_\_  
\_\_\_\_\_

**3. Work-process adaptation**

- a. Were there differences in ways to communicate using the Urban CoCreation Lab platform for same type of discussions during the work-process: VISION?  
Advantages:  
  
Disadvantages:
- b. Is there a specific part of development process this tool could be used best?
- c. During the VISION stage, would it be beneficial for the tool be included as routine part of communication process? Would it be beneficial if the tool is included in the communication package at the institutional level, ex) mail services, so all the internal stakeholders have access to?
- d. What needs to be improved in the tool to be more useful to be part of the routine communication process?
