# Supplementary material for: The Urban CoCreation Lab—An Integrated Platform for Remote and Simultaneous Collaborative Urban Planning and Design through Web-Based Desktop 3D Modeling, Head-Mounted Virtual Reality and Mobile Augmented Reality: Prototyping a Minimum Viable Product and Developing Specifications for a Minimum Marketable Product
Source: MDPI journal article supplement (doi:10.3390/app12020797), 2022-01-13
Supplement: s1 [file s1 › Observation and discussion points workshop 2-1.pdf]

## Observation points for Workshop series 2

### Observation points:

1. Who uses the tool most? Is there any person who is using more or least? In that case, ask why not using the tool actively?
2. How many times do participants try to change at the same time? Is there a conflict for simultaneous designing?
3. How much voice discussion is followed by the designing, vice versa?
4. Is using the tool hinder the communication?
5. Is there a difficulty in using the tool? : Are the participants understanding the tool interface intuitively?
6. Which functions are most used?
7. Which other tools are used for communication?
8. General remarks.

### Interview and discussion points:

1. When discussing similar issues, what was the process like using the other tools?
2. How did the new tool compare with other tools for similar discussions? What was different and what was same?
3. What were the advantages? Anything that could be discussed using the new tool which were difficult before?
4. What were the disadvantages? Anything that could be easily discussed using old tools which were difficult with the new tool?
5. Was there anything that was difficult to use interface-wise?
6. What was the most useful function in the tool and least useful?
7. Which other functions should be included or further developed for better use?
8. Do you think using this tool could be included in the work process for the stage 3 and how would the work-process change? How could this tool be included in the process at which steps (more methodically)?
